# Supplementary material for: Postpartum Blood Loss in COVID-19 Patients—Propensity Score Matched Analysis
Source: MDPI journal article supplement (doi:10.3390/biomedicines10102517), 2022-10-09
Supplement: s1 [file s1]

**Table S1.** Patient characteristics before matching procedure.

| Variable                                     | Patients (N=325)         |                        | p-value   |
|----------------------------------------------|--------------------------|------------------------|-----------|
|                                              | COVID-19 Cases (N = 203) | Controls (N=122)       |           |
| Labor $\geq 3$                               | 31 (15%)                 | 20 (16%)               | 0.788*    |
| Previous operation on uterus                 | 52 (26%)                 | 41 (34%)               | 0.123*    |
| Anticoagulant use                            | 11 (5.4%)                | 9 (7.4%)               | 0.477*    |
| Induction of labor                           | 34 (17%)                 | 26 (21%)               | 0.305*    |
| Fail to labor progress                       | 14 (6.9%)                | 10 (8.2%)              | 0.664*    |
| Diabetes                                     | 31 (15%)                 | 20 (16%)               | 0.788*    |
| Preeclampsia                                 | 18 (8.9%)                | 14 (11%)               | 0.445*    |
| Hypothyroidism                               | 43 (21%)                 | 26 (21%)               | 0.978*    |
| Cesarean section                             | 134 (66%)                | 78 (64%)               | 0.704*    |
| Gestational age (weeks)                      | 39 (38; 40)              | 39 (38; 40)            | 0.456***  |
| BMI (kg/m <sup>2</sup> )                     | 28.63 (26.08; 31.18)     | 27.74 (26.31; 31.09)   | 0.468***  |
| Hematocrit count before birth (%)            | 37.80 (35.70; 39.75)     | 37.60 (35.92; 40.08)   | 0.932***  |
| Duration of hospitalization (days)           | 6 (5; 6.5)               | 6 (5; 6.75)            | 0.935***  |
| Blood units transfused (N)                   | 1 (1; 1)                 | 1 (1; 1)               | 0.009***  |
| Peritoneal drainage                          | 47 (23%)                 | 0 (0%)                 | <0.001**  |
| Postpartum hemorrhage                        | 11 (5.4%)                | 1 (0.8%)               | 0.035**   |
| Estimated blood loss (ml)                    | 350 (300; 400)           | 350 (300; 400)         | 0.021***  |
| Platelet count (10 <sup>3</sup> /μl)         | 196 (156; 236.5)         | 210 (181; 241.25)      | 0.011***  |
| Hemoglobin concentration before birth (g/dl) | 13 (12.15; 13.6)         | 12.4 (11.9; 13.3)      | 0.003***  |
| Hemoglobin concentration after birth (g/dl)  | 11.6 (10.75; 12.5)       | 11.15 (10.50; 11.90)   | 0.005***  |
| Decrease in hemoglobin concentration (g/dl)  | 1.2 (1.8; 0.6)           | 1.25 (2; 0.52)         | 0.865***  |
| Hematocrit concentration after birth (%)     | 34.4 (32.1; 36.85)       | 33.75 (31.7; 36.68)    | 0.341***  |
| Hematocrit concentration loss (%)            | 3 (5; 1.3)               | 3.5 (5.62; 2)          | 0.037***  |
| Leukocyte count (10 <sup>3</sup> /μl)        | 9.20 (7.44; 10.85)       | 10.53 (9.29; 12.93)    | <0.001*** |
| Lymphocyte count (10 <sup>3</sup> /μl)       | 1.59 (1.20; 1.93)        | 1.87 (1.49; 2.2)       | <0.001*** |
| Neutrophile count (10 <sup>3</sup> /μl)      | 6.89 (5.24; 8.4)         | 7.61 (6.49; 9.68)      | <0.001*** |
| Sodium serum level (mmol/L)                  | 139.00 (137; 140)        | 138.07 (137; 140)      | 0.993***  |
| Potassium serum level (mmol/L)               | 4.09 (3.88; 4.28)        | 4.15 (3.98; 4.28)      | 0.122***  |
| APTT (seconds)                               | 29.90 (27.4; 32.4)       | 28 (26.50; 29.85)      | <0.001*** |
| INR                                          | 0.95 (0.92; 0.98)        | 0.97 (0.94; 1.02)      | <0.001*** |
| Birth weight (g)                             | 3,450 (3,090; 3,770)     | 3,375 (3,097.5; 3,730) | 0.916***  |

\*Pearson's Chi-squared test; \*\*Fisher's exact test; \*\*\*Mann-Whitney U test.  
Categorical variables are presented as N (%) and continuous variables are presented as Median (IQR).

**Table S2.** Univariate and multivariate logistic regression before propensity score matching

| Variable                     | Univariate logistic regression |             |          | Multivariate logistic regression |            |          |
|------------------------------|--------------------------------|-------------|----------|----------------------------------|------------|----------|
|                              | OR                             | 95% CI      | p; value | OR                               | 95% CI     | p; value |
| COVID-19                     | 4.19                           | 1.44; 15.1  | 0.014    | 5.92                             | 1.82; 23.9 | 0.006    |
| ≥ 3 labours                  | 1.55                           | 0.35; 4.95  | 0.500    | 0.71                             | 0.14; 2.75 | 0.600    |
| Previous operation on uterus | 2.38                           | 0.87; 6.77  | 0.090    | 2.67                             | 0.8; 9.39  | 0.110    |
| Anticoagulant use            | 3.55                           | 0.78; 11.7  | 0.057    | 2.04                             | 0.35; 8.89 | 0.400    |
| Induction of labor           | 0.9                            | 0.2; 2.94   | 0.900    | 2.23                             | 0.43; 8.92 | 0.300    |
| Fail to labour progress      | 0                              | -           | > 0.900  | 0                                | -          | > 0.900  |
| Diabetes                     | 1.38                           | 0.31; 4.39  | 0.600    | 1.51                             | 0.31; 5.63 | 0.600    |
| Preeclampsia                 | 0.67                           | 0.04; 3.42  | 0.700    | 0.49                             | 0.03; 2.93 | 0.500    |
| Hypothyroidism               | 0.23                           | 0.001; 1.16 | 0.200    | 0.13                             | 0; 0.91    | 0.110    |
| Cesarean section             | 3.94                           | 1.09; 25.3  | 0.072    | 3.11                             | 0.71; 22.4 | 0.20     |
| Week of pregnancy            | 0.89                           | 0.81; 0.98  | 0.013    | 0.88                             | 0.8; 0.99  | 0.015    |
| BMI                          | 0.99                           | 0.87; 1.1   | 0.800    | 0.99                             | 0.87; 1.11 | 0.800    |
| Hematocrit                   | 0.99                           | 0.85; 1.16  | 0.900    | 1                                | 0.85; 1.18 | >0.900   |
